# Supplementary material for: Distance measurement between trityl radicals by pulse dressed electron paramagnetic resonance with phase modulation
Source: Copernicus journal article supplement (doi:10.5194/mr-2020-7), 2020-03-19
Supplement: Supplementary file [file mr-2020-7-RC1-supplement.pdf]

The manuscript of Wili et al. describes a very new and exciting experiment to measure dipolar couplings between two trityl radicals at Q-band frequencies using spin-lock techniques and phase modulation two pulse echo of this 'dressed spin states' in the nutation frame. This work adds a new possibilities to prolong the observation time window for the measurement of dipolar couplings in EPR which could be useful to extend the distance range in the future. Despite the fact that the experimental problems seen (and described very clear and fair in the manuscript) do not allow routine application of this methods yet for long distances (where the dipolar coupling strength is much less than the inhomogenous linewidth) this very new approach is very interesting.

The experiments as well as the theoretical description and discussion is very good, the literature is cited appropriately and the existing problems with this very new approach – especially limitations with respect to Rabi oscillation frequency strength in comparison with the inhomogeneous linewidth – is fair and clear described. There are many interesting aspects in this work, as for example also the large difference between T1rho and T2rho, which will stimulate further work in this direction. I recommend publication of this very nice and innovative article.

Some small remarks:

- Line 26 there should be an 'for' instead of 'or'
- The exchange interaction is explicitly mentioned in the theoretical part; also the fact that in the interaction frame it might gain some additional importance because the Zeeman splitting and the linewidth offsets disappear. But then it is not mentioned any more. Of course the two model systems will not show such contributions, but maybe the authors have investigated potential effects of this theoretically? It would be nice to have a remark on this aspect in the discussion (or conclusion). As far as I see all trityls will be in the strong coupling regime, so the method could also work for shorter distances, where such interaction might play a role.
- It will be interesting to see what happens with the deuterated trityl radicals. As mentioned this will be something for a new publication and might shine some more light on the big differences between T1rho and T2rho. Also the T dependence of these rotating frame relaxation rates could be very interesting (also to further optimize the experiment)
- The exponential 'stretch' factors for the fits of T1rho and T2rho should also be given.
- The modulation amplitude aPM was set to 0.3 for the experiments and it is also mentioned in the manuscript that the theoretical modelling brakes down if this factor becomes too large. Can this be more quantified?
-
